# Supplementary material for: Autologous organoid co-culture model reveals T cell-driven epithelial cell death in Crohn’s Disease
Source: PubMed Central journal article supplement (PMC9685428; doi:10.3389/fimmu.2022.1008456), 2022-11-10
Supplement: DataSheet_1.pdf [file DataSheet_1.pdf]

## ELYP Phenotype cohort

n = 85

|                                                  |          |
|--------------------------------------------------|----------|
| Gender                                           |          |
| - Male                                           | 44 (52%) |
| - Female                                         | 41 (48%) |
| IBD Type and Location                            |          |
| - Colonic Crohn's Disease                        | 28 (33%) |
| - Ileal Crohn's Disease                          | 12 (14%) |
| - Ulcerative Colitis                             | 39 (46%) |
| - Pouchitis                                      | 6 (7%)   |
| Treatment Initiated                              |          |
| -Anti TNF                                        | 49 (58%) |
| -Vedolizumab                                     | 16 (19%) |
| -Ustekinumab                                     | 20 (23%) |
| Previous Surgery                                 | 27 (31%) |
| Smoking                                          |          |
| - No smokers                                     | 68 (79%) |
| - Active smokers                                 | 12 (14%) |
| - NA                                             | 5 (7%)   |
| Extra intestinal manifestations                  |          |
| - Articular                                      | 15 (17%) |
| - Cutaneous                                      | 4 (5%)   |
| - Ocular                                         | 3 (3%)   |
| Previous exposure to                             |          |
| - Azathioprine                                   | 65 (76%) |
| - Methotrexate                                   | 29 (34%) |
| Endoscopic response at the end of the study      |          |
| - No Response                                    | 24 (28%) |
| - Response                                       | 26 (31%) |
| - Remission                                      | 17 (20%) |
| - No endoscopy (Study exit or lost to follow-up) | 18 (21%) |
| Phenotype at inclusion                           |          |
| - Yes                                            | 81 (95%) |
| - No                                             | 4 (5%)   |
| Phenotype at the end of the study                | 45 (53%) |
| - Yes                                            | 40 (47%) |
| - No                                             |          |
