# Supplementary material for: Autologous organoid co-culture model reveals T cell-driven epithelial cell death in Crohn’s Disease
Source: PubMed Central journal article supplement (PMC9685428; doi:10.3389/fimmu.2022.1008456), 2022-11-10
Supplement: DataSheet_2.pdf [file DataSheet_2.pdf]

| REMIND Phenotype cohort                    | n=72             |
|--------------------------------------------|------------------|
| Gender                                     |                  |
| - Male                                     | 34 (47%)         |
| - Female                                   | 38 (53%)         |
| Median Age, yr (IQR)                       | 32.6 (26.8-45.0) |
| Age at CD Diagnosis                        |                  |
| -<16 years (A1)                            | 11 (15%)         |
| -17-40 years (A2)                          | 53 (74%)         |
| ->40 years (A3)                            | 8 (11%)          |
| Median disease duration, yr (IQR)          | 10.4 (3.85-19.4) |
| Smoking                                    |                  |
| - Non smokers                              | 27 (38%)         |
| - Active smokers at surgery                | 31 (43%)         |
| - Ex smokers                               | 14 (19%)         |
| Previous intestinal resection              |                  |
| -Yes                                       | 22 (31%)         |
| -No                                        | 50 (69%)         |
| Number of previous resection(s)            |                  |
| - 0                                        | 50 (69%)         |
| - 1                                        | 14 (19%)         |
| - 2                                        | 5 (7%)           |
| - 3                                        | 3 (5%)           |
| Surgical indication                        |                  |
| -Stricture complication                    | 38 (53%)         |
| -Penetrating complication                  | 33 (46%)         |
| -Failure of drug therapy                   | 1 (1%)           |
| Disease location (Montreal classification) |                  |
| - Ileal (L1)                               | 43 (60%)         |
| - Ileocolonic (L3)                         | 29 (40%)         |
| - Anoperineal lesions                      | 13 (18%)         |
| Extradigestive symptoms                    |                  |
| -Joint manifestations                      | 8 (11%)          |
| -Skin manifestations                       | 3 (4%)           |
| -Eye manifestations                        | 0                |
| Previous exposure to anti-TNF therapy      | 44 (61%)         |
| Previous exposure to thiopurines           | 51 (71%)         |
| Inflamed margin of resection               | 9 (13%)          |
